# Supplementary material for: Novel combinations of PI3K-mTOR inhibitors with dacomitinib or chemotherapy in PTEN-deficient patient-derived tumor xenografts
Source: PubMed Central journal article supplement (PMC5689564; doi:10.18632/oncotarget.19109), 2017-07-08
Supplement: oncotarget-08-84659-s001.pdf [file oncotarget-08-84659-s001.pdf]

## Novel combinations of PI3K-mTOR inhibitors with dacomitinib or chemotherapy in PTEN-deficient patient-derived tumor xenografts

### SUPPLEMENTARY MATERIALS

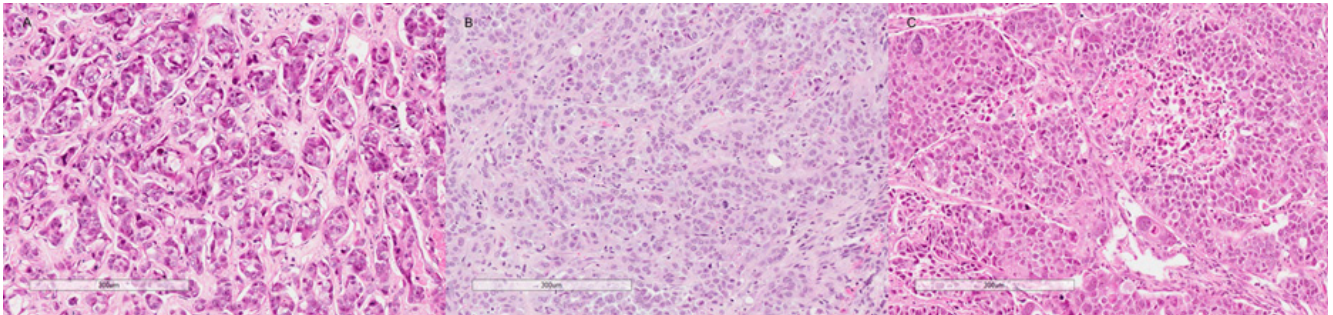

**Supplementary Figure 1: Hematoxylin and eosin stain of patient derived xenografts: A) Triple Negative Breast Cancer model; B) Low Grade Serous Ovaria Cancer model; C) Lung Adenocarcinoma model**
